# Supplementary material for: A lipidomics-based method to eliminate negative urine culture in general population
Source: PubMed Central journal article supplement (PMC11481538; doi:10.1128/jcm.00819-24), 2024-09-16
Supplement: jcm.00819-24-s0001.pdf [file jcm.00819-24-s0001.pdf]

**SUPPLEMENTAL INFORMATION (SI)**

SI. Table 1: Clinical definitions and terminologies

| Results               | Report                                                                                                                                                                                         |                                  |
|-----------------------|------------------------------------------------------------------------------------------------------------------------------------------------------------------------------------------------|----------------------------------|
| Growth                | Reported colony count interpretation is based on number of colonies                                                                                                                            |                                  |
| No Growth             | No growth (<0.1-0.9 x 10 <sup>5</sup> CFU/mL)                                                                                                                                                  |                                  |
| Light or mixed growth | <ul style="list-style-type: none"> <li>▪ If no AST performed and no organism name is being reported</li> <li>▪ Reported colony count interpretation is based on number of colonies:</li> </ul> |                                  |
|                       | <b>If actual colony count is:</b>                                                                                                                                                              | <b>Then reported as:</b>         |
|                       | 1-9 colonies                                                                                                                                                                                   | 0.1-0.9 x 10 <sup>5</sup> CFU/mL |
|                       | 10-99 colonies                                                                                                                                                                                 | 1-9 x 10 <sup>5</sup> CFU/mL     |

SI. Table 2: Microbial library of common uropathogens from study cohort. These were isolates obtained from Vancouver Island Health Authority (VIHA).

| Microbe                        | Signature Ion (m/z) | Satellite Ions (m/z)   |
|--------------------------------|---------------------|------------------------|
| <i>Acinetobacter baumannii</i> | 1728                | 1700, 1883, 1911       |
| <i>Citrobacter koseri</i>      | 1797/1825           | 1905, 1958, 2035, 2063 |
| <i>Enterobacter aerogenes</i>  | 1797                | 1859, 1877, 1929, 2036 |
| <i>Enterobacter cloacae</i>    | 1796                | 1852, 1877, 1905, 2045 |
| <i>Escherichia coli</i>        | 1796                | 1876, 1964             |
| <i>Enterococcus faecalis</i>   | 1430                | 1402,1416, 1456        |
| <i>Hafnia alvei</i>            | 1797                | 1877, 1928, 2035, 2166 |
| <i>Klebsiella pneumoniae</i>   | 1825                | 1797, 1888, 1905, 2063 |
| <i>Klebsiella oxytoca</i> grp  | 1825                | 1767, 1888             |

|                                     |           |                           |
|-------------------------------------|-----------|---------------------------|
| <i>Klebsiella variicola</i>         | 1825      | 1614, 1887, 1905, 2079    |
| <i>Pseudomonas aeruginosa</i>       | 1446      | 1616                      |
| <i>Pantoea agglomerans</i>          | 1797      | 1877, 1931, 2045, 2099    |
| <i>Providencia rettgeri</i>         | 1956      | 1825, 2063, 2124, 2194    |
| <i>Staphylococcus aureus</i>        | 1351      | 1295, 1323, 1379, 1407    |
| <i>Serratia marcescens</i>          | 1857      | 1797,1825,1905,1929, 2063 |
| <i>Proteus vulgaris</i>             | 1826      | 1729, 1957, 2062, 2195    |
| <i>Proteus mirabilis</i>            | 1826      | 1729, 1956, 2063, 2194    |
| <i>Aerococcus urinae</i>            | 1430      | 1327, 1403                |
| <i>Morganella morganii</i>          | 1376/1797 | 1928, 2035                |
| <i>Enterococcus faecium</i>         | 1327      | 1313, 1375, 1403          |
| <i>Staphylococcus saprophyticus</i> | 1323      | 1295, 1351,1387, 1414     |
| <i>Candida albicans</i>             | 1356      | 1328, 1335, 1349,1692     |
| <i>Enterococcus avium</i>           | 1389      | 1347, 1418                |
| <i>Streptococcus agalactiae</i>     | 1403      | 1375, 1431                |

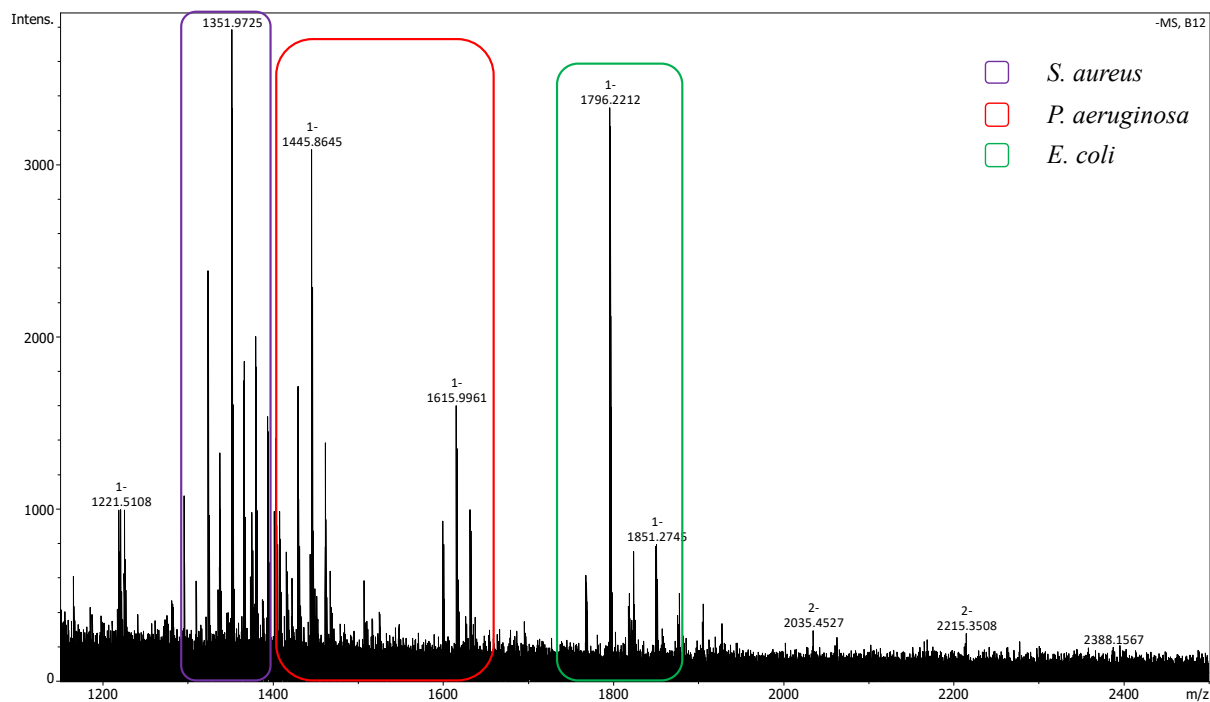

SI. Fig 1: Polymicrobial urine sample. UTI positive sample containing *E.coli*, *P. aeruginosa* and *S. aureus*.

### Limit of Detection study

This study involves systematically diluting known concentrations of bacterial cultures to assess the lowest concentration at which FLAT can reliably detect and identify pathogens. Samples were analyzed in triplicate.

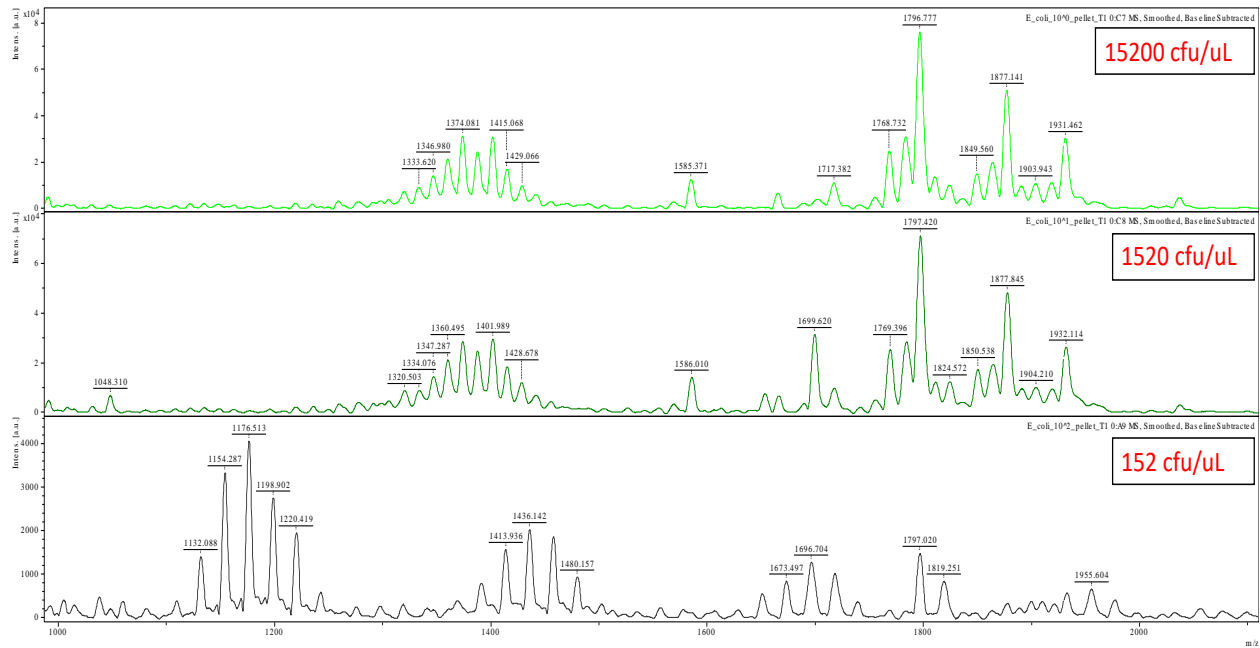

SI. Fig 2: Limit of detection of *E. coli*

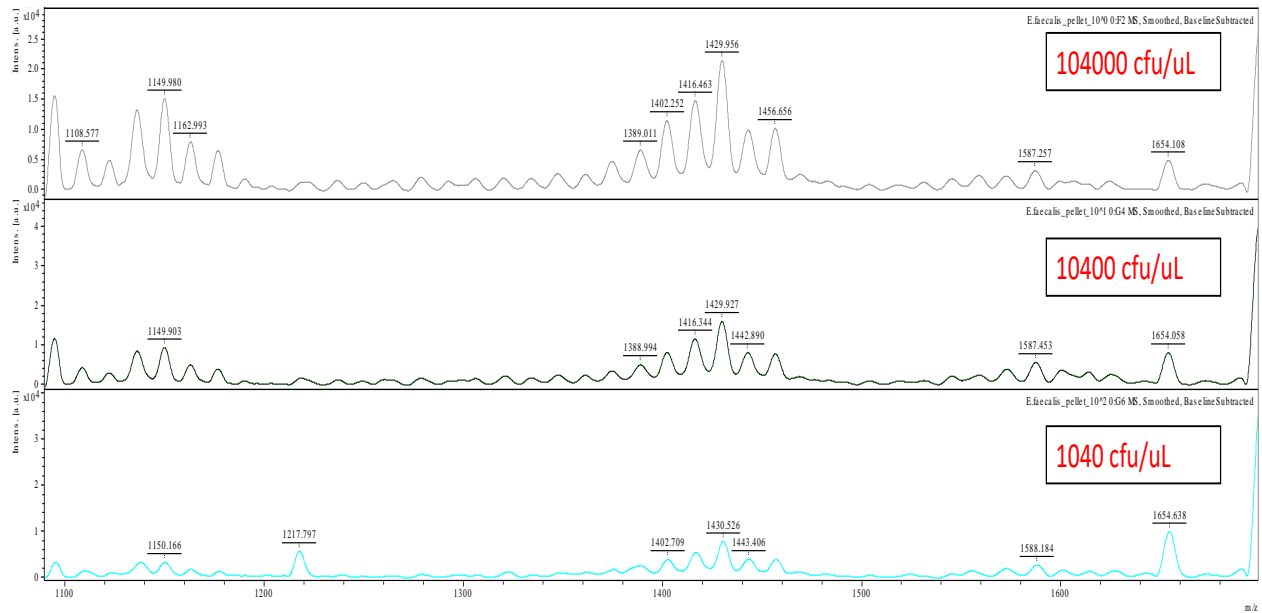

SI. Fig 3: Limit of detection of *E. faecalis*

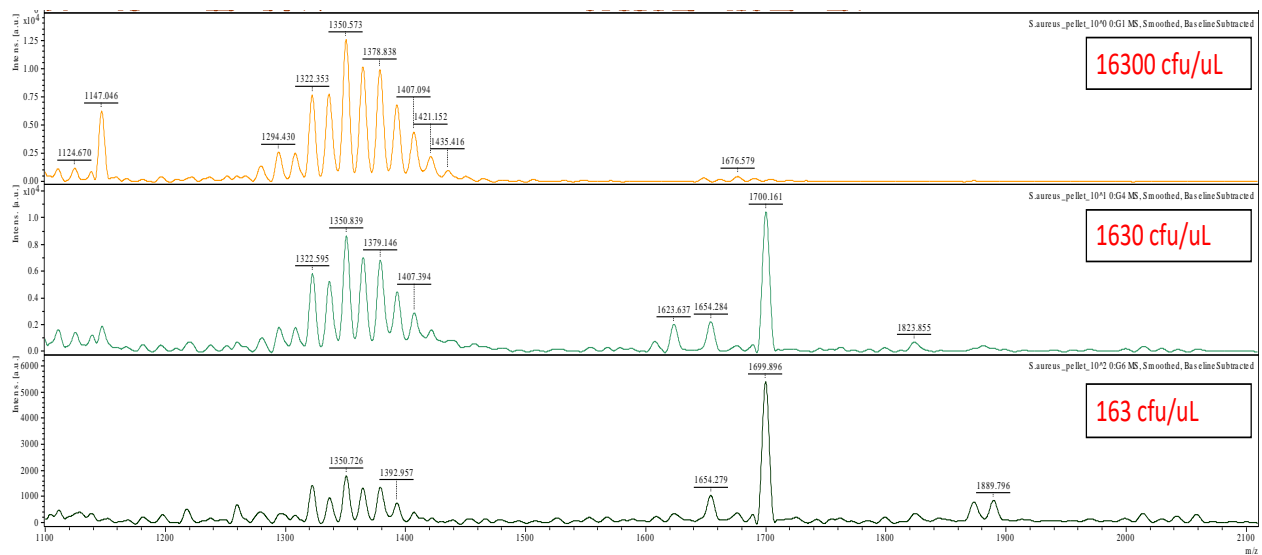

SI. Fig 4: Limit of detection of *S. aureus*

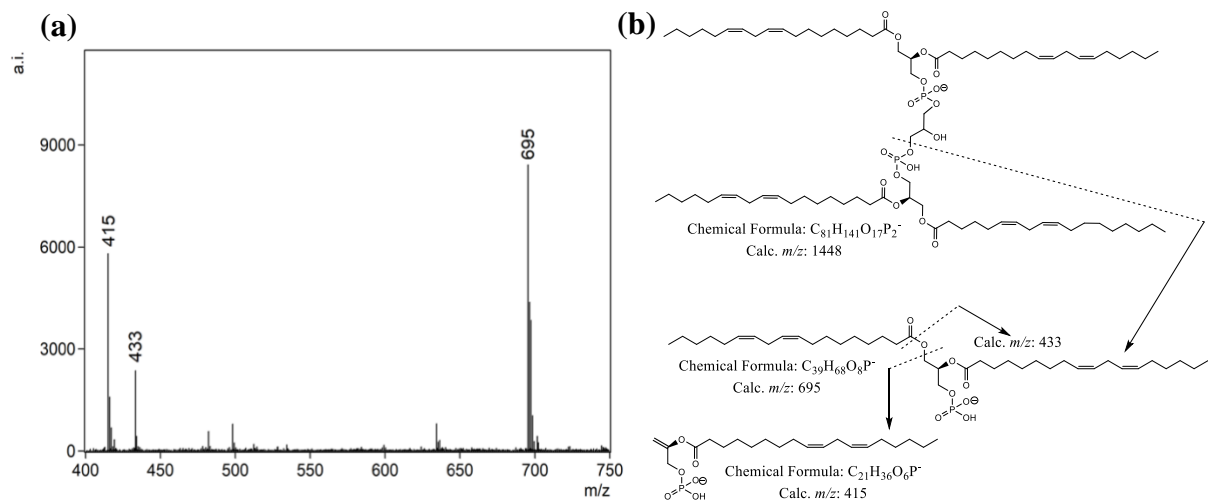

SI. Fig 5: FLAT mass spectrum of 1448 interferences (a) A mass spectrum of  $m/z$  1448 ion selected for tandem MS (b) Predicted structure of 1448 ion. All data from MALDI-timsTOF-MS.

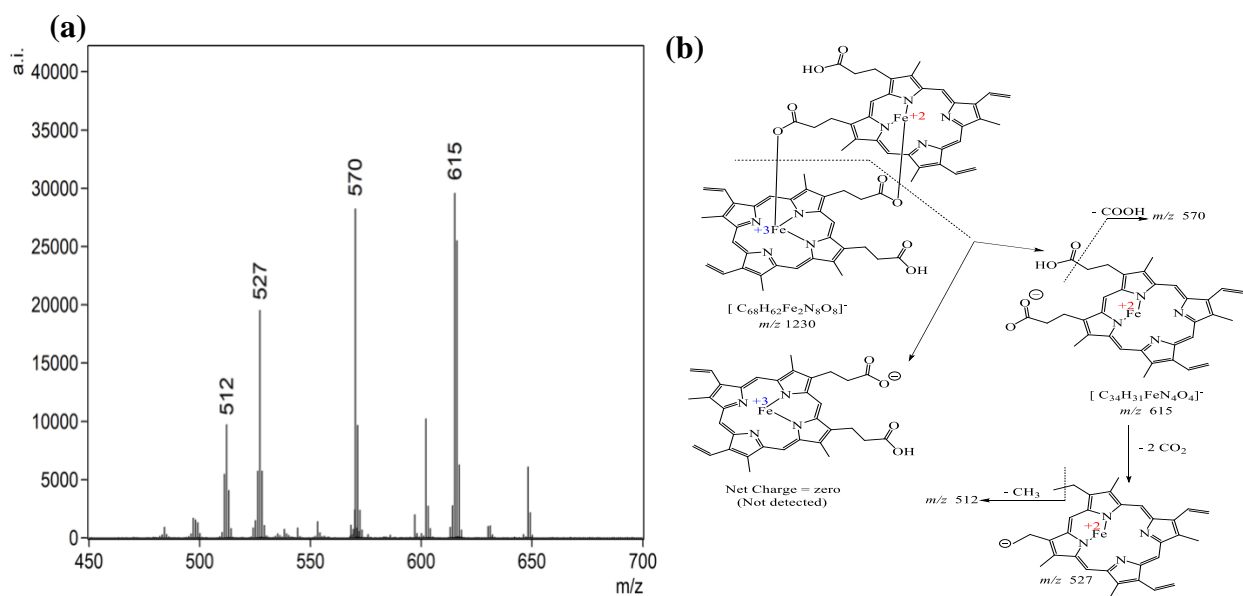

SI. Fig 6: FLAT mass spectrum of heme with the FLAT analysis of urine samples with blood: (a) Tandem MS spectra of 1230 ion (b) Predicted structure of 1230 ion. All data from MALDI-timsTOF-MS.
